# Supplementary material
Source: PubMed Central journal article supplement (PMC3310152)

Supplementary Fig. 1.

Transfection efficiency of GISP. GISP (2  $\mu\text{g}$ ) is transfected in HEK cells and a field of cells imaged to show transfection efficiency. A, GISP (green) and B, transmission image. Scale bar 20  $\mu\text{m}$ .

## Sup Fig 1

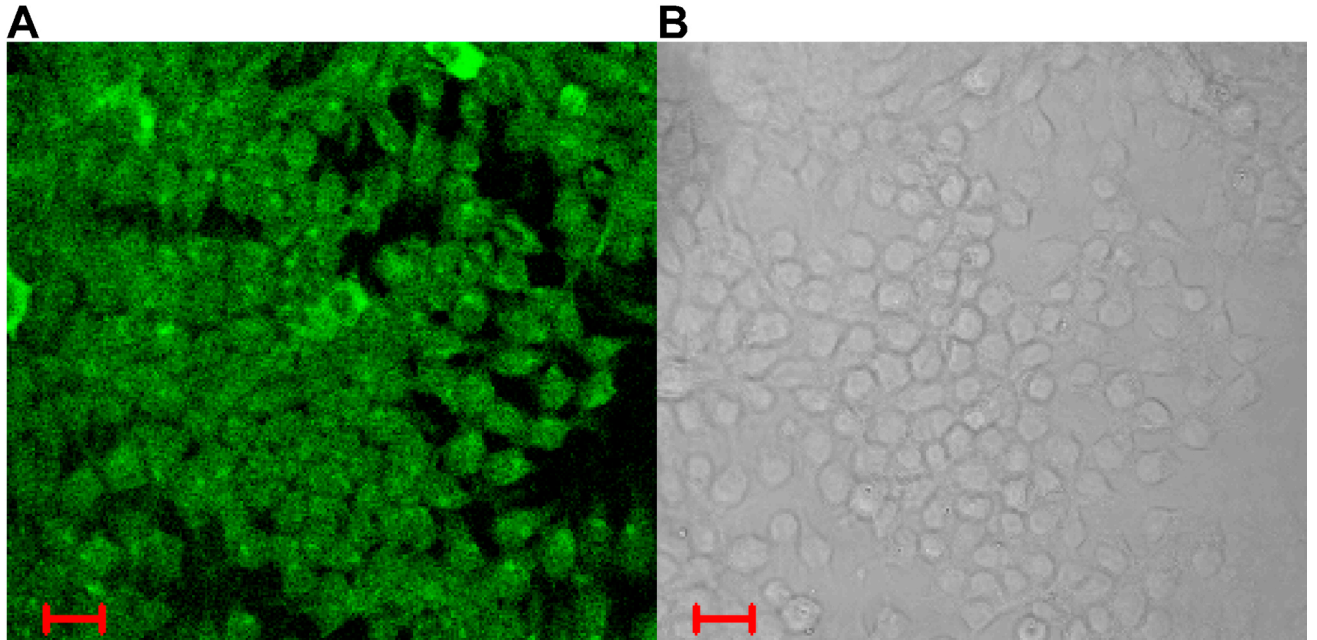

Supplement: NIHMS40392-supplement-Supp_Fig_1.pdf [file NIHMS40392-supplement-Supp_Fig_1.pdf]
